# Supplementary material for: Enlarging the application of potassium titanate nanowires as titanium source for preparation of TiO2 nanostructures with tunable phases
Source: Royal Society of Chemistry journal article supplement (doi:10.1039/c2ce06672f), 2012-01-01
Supplement: c2ce06672f.pdf [file c2ce06672f.pdf]

## Electronic Supplementary Information (ESI)

### Enlarging the application of potassium titanate nanowires as titanium source for preparation of TiO<sub>2</sub> nanostructures with tunable phases

Jianming Li, Hailin Yang, Qi Li, Dongsheng Xu\*

Beijing National Laboratory for Molecular Sciences, State Key Laboratory for Structural Chemistry of Unstable and Stable Species, College of Chemistry and Molecular Engineering, Peking University, Beijing 100871, P.R. China

\* To whom all correspondence should be addressed. E-mail: [dsxu@pku.edu.cn](mailto:dsxu@pku.edu.cn), Tel: 86-10-62753580, Fax: 86-10-62760360.

#### XPS date report:

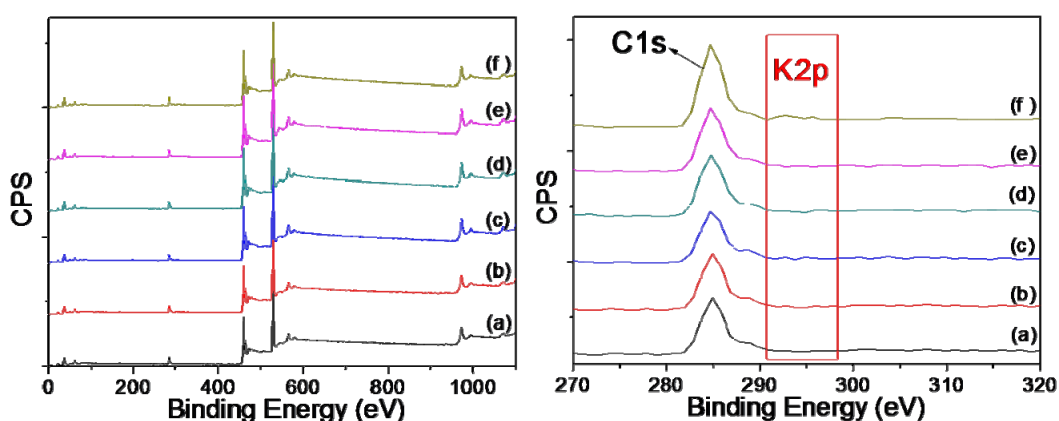

**Fig. S1** X-ray photoelectron spectra (Left: full spectra; Right: K2p) of the samples with single or mixed TiO<sub>2</sub> phases: (a) rutile, (b) brookite/rutile, (c) brookite/rutile/TiO<sub>2</sub>(B), (d) TiO<sub>2</sub>(B), (e) TiO<sub>2</sub>(B)/anatase, (f) anatase. There was no residual potassium in all the prepared TiO<sub>2</sub> nanocrystals.

**TEM and HRTEM images of coupled phases:**

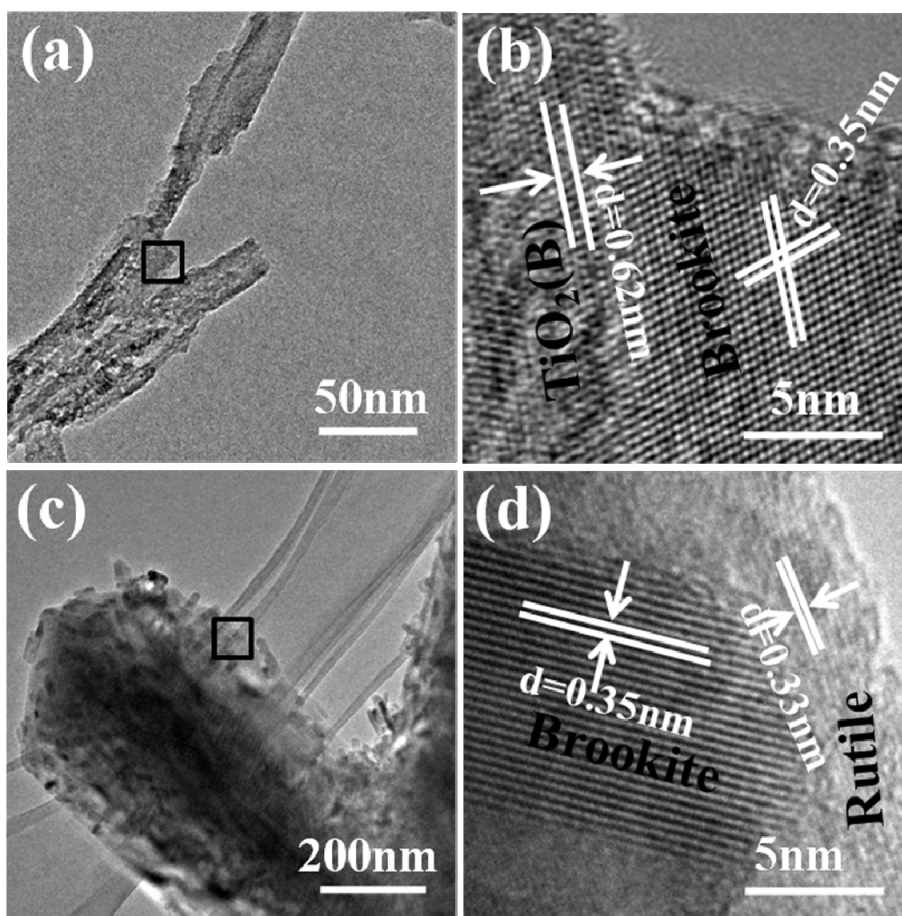

**Fig. S2** Transmission electron microscopy (TEM) and high-resolution TEM (HRTEM) images of coupled-phase TiO<sub>2</sub> samples: (a)-(b) TiO<sub>2</sub>(B)/brookite, (c)-(d) brookite/rutile.
